# Supplementary material
Source: PubMed Central journal article supplement (PMC3809804)
Supplement: JCI71353sd.pdf [file JCI71353sd.pdf]

## Supplementary material

### 301 **Detailed Methods:**

302 **Animals:** CBA/CaJ mice of both sexes were obtained from the Jackson Laboratory. Mice were  
303 age 3 months at the beginning of each experiment. Mice were euthanized by CO<sub>2</sub> inhalation  
304 followed by decapitation. All procedures were approved by the NIDCD Animal Care and Use  
305 Committee.

306

307 **Hearing testing:** “Pre-test” auditory brainstem response (ABR) thresholds were measured 24-  
308 48 hours prior to the first drug (cisplatin or kanamycin) administration. “Post-test” ABR  
309 thresholds and distortion-product otoacoustic emissions (DPOAEs) were measured 15 days  
310 after the final cisplatin administration or 21 days after the final aminoglycoside administration.  
311 Animals were anesthetized via an intra-peritoneal injection of ketamine (100 mg/kg) and  
312 xylazine (20 mg/kg) and placed on a warming pad to maintain body temperature at 37°C.

313

314 For ABR testing, subdermal needle electrodes were placed at the vertex and pinna with a  
315 ground in the hind leg. For the cisplatin experiments, ABRs thresholds were measured at 4, 8,  
316 11.2, 16, 22.4, and 32 kHz using an Intelligent Hearing Systems SmartEP system (v. 4.0). For  
317 the kanamycin experiment, ABR thresholds were measured up to 40 kHz using a Tucker-Davis  
318 Technologies TDT System 3 RZ6 ABR and DPOAE Workstation (Tucker Davis Technologies).  
319 For both experiments, stimuli were 3 ms tone pips (Blackman-gated, 1.5 ms rise/fall) presented  
320 at a rate of 29.9/s. Responses were amplified (100,000x for IHS; 20x for TDT) and filtered (.3-  
321 3k Hz), and 512-1024 responses were averaged at each stimulus presentation level.  
322 Thresholds were determined by visual inspection of stacked waveforms for the lowest level at  
323 which any repeatable peak could be obtained. Stimuli were presented at 80 dB SPL and  
324 decreased in 10 dB steps until no response was observed, then increased in 5 dB steps until a

325 repeatable response was observed. Two waveforms (1024 sweeps each) were obtained at  
326 levels at and near threshold to confirm reproducibility of peaks or absence of response.  
327 Threshold shifts are reported as the difference between pre-test and post-test ABR thresholds.  
328  
329 DPOAEs were obtained using TDT System 3 hardware and software (BioSigRz, v 5.1) in  
330 conjunction with an ER-10B+ microphone (Etymotic). A “DPgram” was measured using fixed  
331 primary tone levels of  $f_1 = 65$  dB SPL and  $f_2 = 55$  dB SPL with  $f_2/f_1 = 1.25$  and  $f_2 = 4, 8, 11.2,$   
332  $16, 22.4, 32,$  and  $44.8$  kHz. The amplitude of the  $2f_1-f_2$  DPOAE and surrounding noise were  
333 determined from the FFT of the averaged data (512 averaged responses per data point). The  
334 TDT system output is given in dB voltage (dBV); therefore, data were converted to dB SPL  
335 offline.

336  
337 **Sound preconditioning:** Preconditioning sound consisted of an 8-16 kHz octave-band noise  
338 presented for 2 hrs. The noise stimulus was generated using TDT hardware and software  
339 (RPvdsEx, v.76). Unanesthetized mice were placed in a custom-built cage that is subdivided  
340 into four compartments with one mouse per compartment. The cage was placed on a slowly-  
341 rotating (2.7 RPM) turntable in order to ensure a uniform sound exposure over the four-  
342 compartment area of the cage. An FF-1 speaker was mounted 10 cm above the cage.  
343 Calibration with the cage in place indicated mean stimulus levels of  $90.1 \pm 2.7$  dB within the four  
344 compartments. Mice in the cisplatin protocol underwent sound exposures on seven days (1, 3,  
345 10, 14, 16, 23, and 28). Mice in the kanamycin protocol underwent sound exposures on five  
346 days (1, 4, 7, 10, and 13). Sound-only mice were exposed to the same sound schedule as  
347 cisplatin + sound mice. Mice in the cisplatin-only (no sound) group were placed in the  
348 subdivided cage atop the rotating turntable for 2 hours without sound exposure on the same  
349 schedule as the cisplatin + sound mice to control for any effects of environmental stress caused

350 by the handling and cage environment. Each conditioning experiment included  $N = 4-8$  mice  
351 per experimental group.

352  
353 **Measurement of ABR wave I amplitudes:** ABR wave I amplitudes were measured for the  
354 sound-only mice in the kanamycin experiment. These mice were exposed to the sound protocol  
355 5 times over 13 days (Figure 3A). ABRs were recorded prior to the first kanamycin injection and  
356 again 21 days after the final kanamycin injection. Peak-to-peak wave I amplitude was  
357 calculated from the waveforms at 50 dB SPL for both the pre-test and post-test ABRs (30).

358  
359 **4x4 Cisplatin Administration Protocol:** Mice were prehydrated with 2-3 mL of saline (0.9%  
360 NaCl, Hospira) administered subcutaneously 24 hrs before the initial cisplatin injection.  
361 Cisplatin (100 mg/mL; PCH Pharmachemie) was administered intraperitoneally at a dose of 4  
362 mg/kg each day for 4 days. Mice also received subcutaneous saline each day they received  
363 cisplatin. Mice recovered for 10 days following this 4-day cisplatin injection period, during which  
364 they were given 1.0-2.0 mL subcutaneous saline for 5 days (or longer if needed). This 14-day  
365 injection-plus-recovery protocol was repeated twice more for a total of 3 cycles of cisplatin  
366 administration. Mice had an additional 4-5 days recovery following the final cisplatin injection  
367 period before the post-test ABR.

368 **8X2 Cisplatin Administration Protocol:** Mice received the same prehydration treatment as in  
369 the 4X4 protocol (above). Cisplatin was administered at 8 mg/kg/day for 2 days, and mice  
370 recovered for 10 days between cisplatin administration periods. The entire 12-day  
371 administration-plus-recovery protocol was repeated twice more for a total of 3 cycles, with an  
372 additional 4-5 days of recovery following the final cisplatin administration. Thus this protocol  
373 resulted in the same cumulative dose of cisplatin (48 mg/kg) as the 4X4 protocol. Control

374 animals received intraperitoneal and subcutaneous saline injections at the same volumes and  
375 on the same schedules as the cisplatin-treated animals.

376

377 **Kanamycin administration:** Kanamycin sulfate (Sigma) was dissolved in sterile saline at a  
378 final concentration of 45 mg/ml, after considering the kanamycin activity (78.2% of the product's  
379 weight) and corrections for sulfate and water. Sterile-filtered kanamycin (750 mg/kg) was  
380 injected subcutaneously twice daily (8 hours apart) for 17 days. Mice recovered for 21 days  
381 after the final kanamycin injection to allow the hearing loss to stabilize prior to the ABR post-test  
382 (31-33).

383 **Care and husbandry of cisplatin-treated mice:** Cisplatin-treated mice were monitored  
384 several times a day. Body weight (BW) and body condition (BC) scores (34) were recorded  
385 daily prior to the administration of any fluids. Mice received 2-3 mL of subcutaneous saline  
386 (0.9% NaCl, Hospira) 24 hrs before the initial cisplatin injection. On each day of cisplatin  
387 administration and for the first 5 days of each 10-day recovery period, mice received 1.0-2.0 mL  
388 of subcutaneous saline (0.9% NaCl, Hospira). Additional saline injections were provided on the  
389 last 5 days of recovery if needed. Mice falling below 75% of their pre-cisplatin BW were hand-  
390 fed a nutrient-rich high calorie liquid food supplement (STAT®, PRN, Pharmactal) daily until their  
391 BW rose to above 75%. In addition to their regular diet (Wafer, NIH-07, Zeigler Bros, Inc.), mice  
392 were also provided with grapes, mini treats (BioServ) and bacon softies (BioServ). The survival  
393 rate for cisplatin-treated mice was 90.5%. Control mice that did not receive cisplatin had their  
394 body weight and body condition scores recorded weekly.

395 **Isolation of cochlear RNA:** For the *Hsp32* and *Hsp70* mRNA induction timecourse experiment  
396 (Figure 1C), mice were exposed to sound in the sound chamber as described above. After  
397 sound exposure, mice ( $N = 3-9$  per timepoint) were returned to their home cages and remained

398 in a quiet room for 2, 4, 8, or 12 hours before being euthanized. For the examination of sound-  
399 induced *Hsp70* mRNA levels in brain, cochlea, heart, and kidney (Figure 1D), mice ( $N = 8-10$   
400 per group) were exposed to sound as above. Control mice were not exposed to sound. Both  
401 cochleas from an individual animal were dissected and pooled together in RNALater (Ambion)  
402 overnight at 4°C. RNALater was removed and cochleas were homogenized in TRIzol reagent  
403 (Invitrogen) using a Polytron Homogenizer (Kinematica). The homogenate was subjected to  
404 RNA isolation, and then treated with a Qiagen RNeasy Mini spin column with a 15 min RNase-  
405 free DNase I treatment. RNA quality was assessed by capillary electrophoresis using an Agilent  
406 RNA 6000 Nano chip on an Agilent Bioanalyzer 2100 (Agilent Technologies); only samples with  
407 a RIN score of >8.0 and with distinct 28S and 18S bands at or near 2:1 ratios were used for  
408 RT-qPCR analyses. Yields ranged from 200-900 ng RNA per sample. RNA samples from  
409 brain, heart and kidney were isolated in a similar fashion. RNA yields were higher for these  
410 tissues than cochlear total RNA, so these were diluted to less than 2 µg/ml for RT-qPCR  
411 experiments.

412 **RT-qPCR:** First strand complementary DNA (cDNA) was synthesized from total RNA. 20 µL  
413 RT reactions were prepared using a master mix of Taqman RT-PCR Reagents (Applied  
414 Biosystems) containing 1X Reaction Buffer, 5.5 mM MgCl<sub>2</sub>, 500 µM dNTPs, 2.5 µM random  
415 hexamer primers, 0.4 U/µL RNase Inhibitor, and 1.25 U/µL Multiscribe Reverse Transcriptase.  
416 Each RT reaction was run on a thermocycler with the following parameters: 25°C for 10 mins,  
417 48°C for 30 mins, 95°C for 5 mins and hold at 4°C. Resulting cDNA underwent real-time qPCR  
418 in an Applied Biosystems StepOne RT-PCR System (Applied Biosystems) using the SYBR  
419 Green (Applied Biosystems) detection system and primers designed to amplify *Hsp32*, *Hsp70*  
420 and 18S RNAs using the following primer sets (5'-3'):  
421 *Hsp32* (*Hmox1*): (f) CTCACAGATGGCGTCACTTCGTCA (r) TTGCCAACAGGAAGCTGAGA;  
422 *Hsp70*: (f) AGGCCAGGGCTGGTATTACT (r) AATGACCCGAGTTCAGGATG;

423 *Hsp70.1* (f) TTGTCCATGTTAAGGTTTTGTGGTATA  
424 (r) GTTTTTTTCATTAGTTTGTAGTGATGCAA; 18S (f) TTCGGAAGCTGAGGCCATGATT  
425 (r) TTTCGCTCTGGTCCGTCTTG. Average Cq values were normalized to the 18S ribosomal  
426 RNA signal. Thresholds for amplification curves were generated using the StepOne software  
427 version 2.2.2 and 7500 software V2.0.1. Fold changes relative to control mice were calculated  
428 using the  $\Delta\Delta C_t$  method assuming 100% efficiency. At least three biological replicates were  
429 analyzed per time point (2, 4, 8, and 12 hrs post noise exposure), and each reaction was  
430 performed in triplicate. A similar protocol was used for brain (n=10 biological replicates),  
431 cochlea (n=9 biological replicates), heart (n=10 biological replicates) and kidney (n=4 biological  
432 replicates) for comparison of *Hsp70* mRNA levels in different organs.

433 **Cochlear whole mount preparations and immunofluorescence:** Cochleas ( $N = 3-6$  per  
434 condition) were perfused with ice-cold 4% paraformaldehyde through a small hole in the apex  
435 and also through the round window. They were then fixed in 4% paraformaldehyde overnight at  
436 4°C before being decalcified in 0.5 M EDTA for 3-4 days. Cochleas then washed 3 times in 1x  
437 PBS. Each cochlea was micro-dissected into three turns (apical, middle, basal) and stained with  
438 an antibody against myosin7a (rabbit anti-Myo7a at 1:200, #25-6790, Proteus BioSciences),  
439 which was detected using an Alexa Fluor 546 conjugated goat anti-rabbit IgG secondary  
440 antibody (1:500, Invitrogen). Each cochlear turn was mounted on a glass slide using  
441 Fluoromount G (Electron Microscopy Sciences). 10x images of each cochlear turn were taken  
442 using an LSM 780 confocal microscope (Carl Zeiss Microscopy) with 0.8X optical zoom, and the  
443 length of the cochlea was measured using Zen 2010 software (Carl Zeiss Microscopy). Using  
444 this length estimate, frequency regions were mapped onto the cochlear turns based on  
445 tonotopic mapping data for the mouse cochlea (35). Based on this estimation, OHC counts  
446 were performed per 200  $\mu\text{m}$  or per 30 IHC in each frequency region tested by ABR.

447 **References**

- 448 30. Kujawa, S.G., and Liberman, M.C. 2009. Adding insult to injury: cochlear nerve degeneration  
449 after "temporary" noise-induced hearing loss. *J Neurosci* 29:14077-14085.
- 450 31. Taleb, M., Brandon, C.S., Lee, F.S., Harris, K.C., Dillmann, W.H., and Cunningham, L.L. 2009.  
451 Hsp70 inhibits aminoglycoside-induced hearing loss and cochlear hair cell death. *Cell Stress*  
452 *Chaperones* 14:427-437.
- 453 32. Francis, S.P., Kramarenko, II, Brandon, C.S., Lee, F.S., Baker, T.G., and Cunningham, L.L. 2011.  
454 Celastrol inhibits aminoglycoside-induced ototoxicity via heat shock protein 32. *Cell Death Dis*  
455 2:e195.
- 456 33. Wu, W.J., Sha, S.H., McLaren, J.D., Kawamoto, K., Raphael, Y., and Schacht, J. 2001.  
457 Aminoglycoside ototoxicity in adult CBA, C57BL and BALB mice and the Sprague-Dawley rat.  
458 *Hear Res* 158:165-178.
- 459 34. Ullman-Cullere, M.H., and Foltz, C.J. 1999. Body condition scoring: a rapid and accurate method  
460 for assessing health status in mice. *Lab Anim Sci* 49:319-323.
- 461 35. Viberg, A., and Canlon, B. 2004. The guide to plotting a cochleogram. *Hear Res* 197:1-10.

462

463
